# Supplementary material
Source: Springer Nature journal article supplement (https://www.springermedizin.de/resource/supplementary/12967_2013_1763_MOESM5_ESM.pdf/9575298)

**(a) ELISPOT assay**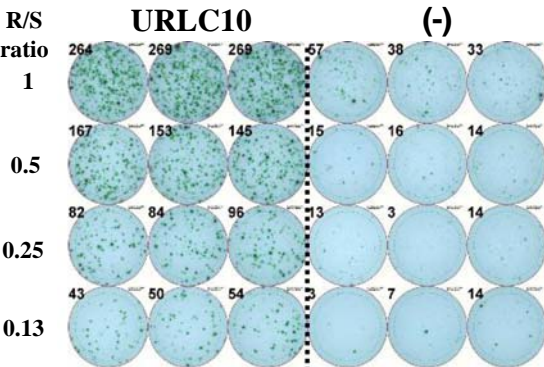**(b) ELISPOT assay**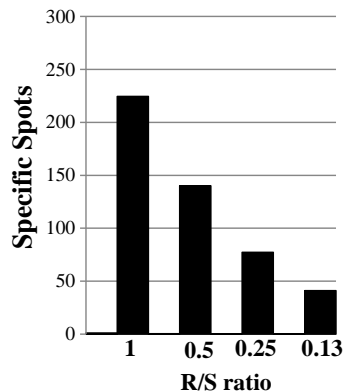**(c) FACS analysis**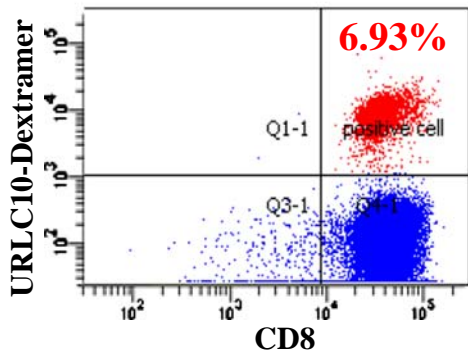

Supplement: MOESM5 [file 9575298]
